# Supplementary material for: Improving genetic risk modeling of dementia from real-world data in underrepresented populations
Source: PubMed Central journal article supplement (PMC11345412; doi:10.1038/s42003-024-06742-0), 2024-08-25
Supplement: 42003_2024_6742_MOESM2_ESM.pdf [file 42003_2024_6742_MOESM2_ESM.pdf]

**A) Hispanic Latino Americans**

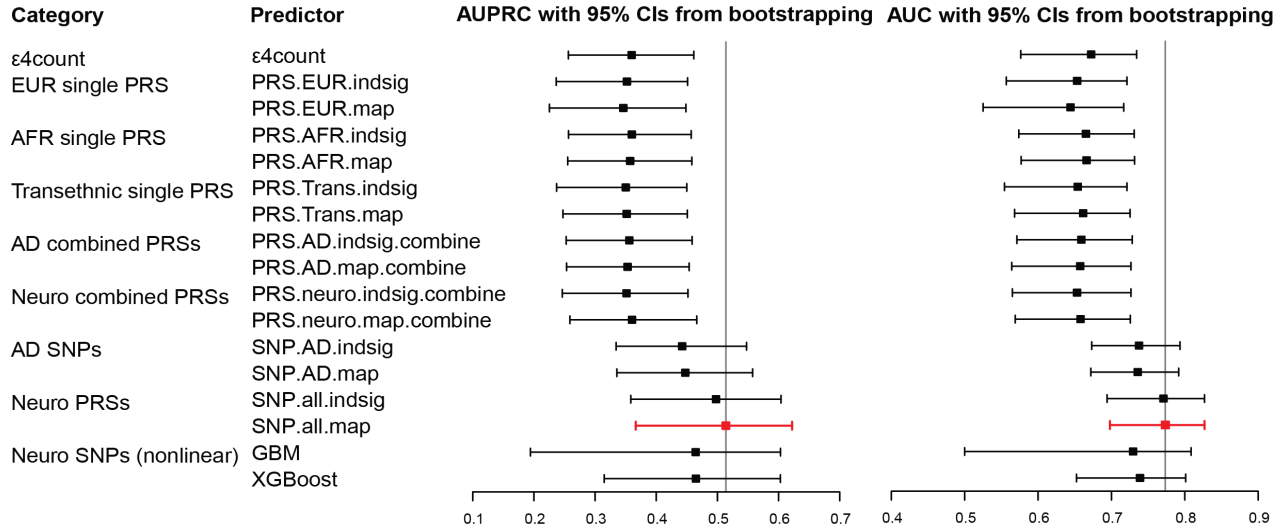

**B) African Americans**

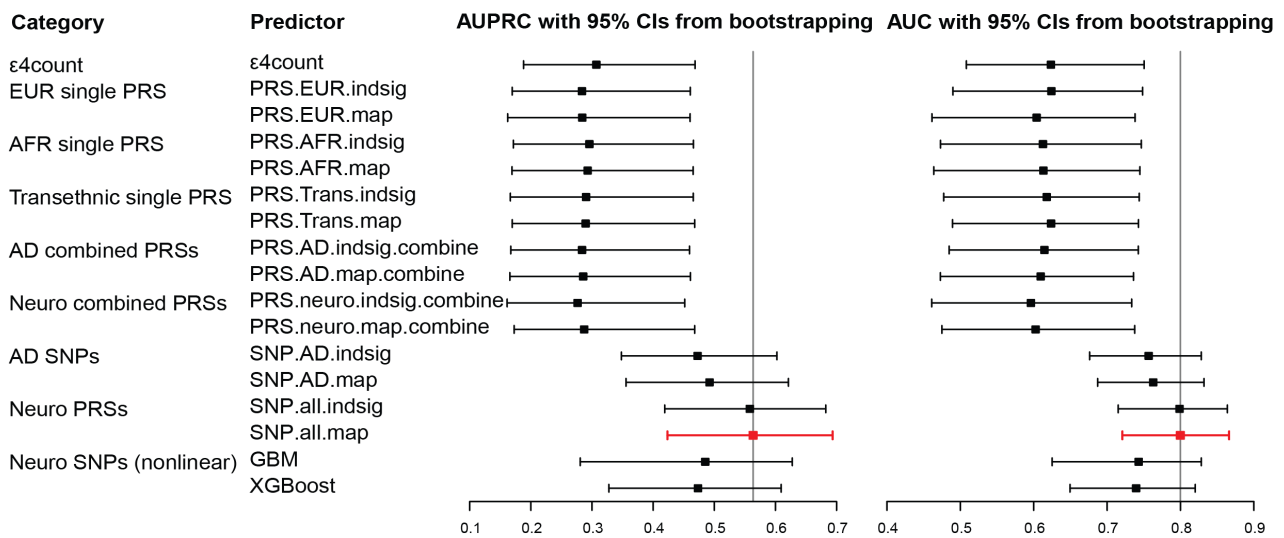

**Supplementary Figure 1. Bootstrapping results on model performance of APOE-ε4 count, polygenic risk score, and machine learning SNP models in dementia genetic prediction, UCLA ATLAS sample, stratified by genetic inferred ancestry group.** All models (if not other specified) have regressed out age, sex, and ancestry-specific principal components. Abbreviations: AD, Alzheimer's Disease; AUROC, Area Under the ROC Curve; AUPRC, Area Under the Precision-Recall Curve; EUR, European; PRS, Polygenic Risk Score; SNP, Single-Nucleotide Polymorphism.

**Supplementary Table 1.** Performance of models using lead SNPs ( $r^2$  cut-off  $<0.1$  for defining independent genome-wide-significant SNPs) in dementia genetic prediction, UCLA ATLAS sample, stratified by genetic

| <b>Hispanic Latino American ancestry sample (N = 610)</b> |                            |              |                                        |                 |                  |               |                    |
|-----------------------------------------------------------|----------------------------|--------------|----------------------------------------|-----------------|------------------|---------------|--------------------|
|                                                           | <b>Overall performance</b> |              | <b>Threshold maximize absolute MCC</b> |                 |                  |               |                    |
|                                                           | <b>AUPRC</b>               | <b>AUROC</b> | <b>F1 score</b>                        | <b>Accuracy</b> | <b>Precision</b> | <b>Recall</b> | <b>Specificity</b> |
| <b>AD EUR PRS</b>                                         | 0.284                      | 0.594        | 0.311                                  | <b>0.761</b>    | <b>0.384</b>     | 0.262         | <b>0.890</b>       |
| <b>AD AFR PRS</b>                                         | 0.314                      | 0.651        | 0.418                                  | 0.716           | 0.363            | 0.492         | 0.775              |
| <b>AD multi-ancestry PRS</b>                              | 0.304                      | 0.623        | 0.375                                  | 0.693           | 0.324            | 0.444         | 0.758              |
| <b>PRSs using AD GWASs only<sup>b</sup></b>               | 0.308                      | 0.640        | 0.419                                  | 0.705           | 0.353            | 0.516         | 0.754              |
| <b>PRSs using AD + Neuro GWASs<sup>c</sup></b>            | 0.298                      | 0.624        | 0.391                                  | 0.703           | 0.339            | 0.460         | 0.767              |
| <b>SNPs from AD GWASs only</b>                            | 0.343                      | 0.684        | 0.431                                  | 0.602           | 0.306            | 0.730         | 0.568              |
| <b>SNPs from AD + Neuro GWASs</b>                         | <b>0.357</b>               | <b>0.695</b> | <b>0.435</b>                           | 0.549           | 0.294            | <b>0.841</b>  | 0.473              |
| <b>African American ancestry sample (N = 440)</b>         |                            |              |                                        |                 |                  |               |                    |
|                                                           | <b>Overall performance</b> |              | <b>Threshold maximize absolute MCC</b> |                 |                  |               |                    |
|                                                           | <b>AUPRC</b>               | <b>AUROC</b> | <b>F1 score</b>                        | <b>Accuracy</b> | <b>Precision</b> | <b>Recall</b> | <b>Specificity</b> |
| <b>AD EUR PRS</b>                                         | 0.206                      | 0.549        | 0.322                                  | 0.627           | 0.247            | 0.464         | 0.666              |
| <b>AD AFR PRS</b>                                         | 0.254                      | 0.590        | 0.342                                  | 0.711           | 0.303            | 0.393         | 0.787              |
| <b>AD multi-ancestry PRS</b>                              | 0.264                      | 0.604        | 0.368                                  | 0.516           | 0.245            | 0.738         | 0.463              |
| <b>PRSs using AD GWASs only<sup>b</sup></b>               | 0.283                      | 0.591        | 0.250                                  | <b>0.809</b>    | <b>0.500</b>     | 0.167         | <b>0.961</b>       |
| <b>PRSs using AD + Neuro GWASs<sup>c</sup></b>            | 0.240                      | 0.572        | 0.343                                  | 0.295           | 0.209            | <b>0.964</b>  | 0.138              |
| <b>SNPs from AD GWASs only</b>                            | 0.281                      | 0.647        | 0.409                                  | 0.691           | 0.322            | 0.560         | 0.722              |
| <b>SNPs from AD + Neuro GWASs</b>                         | <b>0.327</b>               | <b>0.683</b> | <b>0.432</b>                           | 0.755           | 0.387            | 0.488         | 0.817              |

Abbreviations: AD, Alzheimer's Disease; AFR, African American; AUROC, Area Under the ROC Curve; AUPRC, Area Under the Precision-Recall Curve; EUR, European; GWAS, Genome-Wide Association Study; MCC, Matthews Correlation Coefficient; PRS, Polygenic Risk Score; SNP, Single-Nucleotide Polymorphism.

**Notes:**

[a] All models (if not other specified) adjusted for age, sex, and first four ancestry-specific principal components.

[b] All AD PRSs built with EUR, AFR, and multi-ancestry GWASs using P-significant/gene-annotated SNPs were included in the model at the same time.

[c] All AD PRSs built with EUR, AFR, and multi-ancestry GWASs, and neurodegenerative disease PRS (Parkinson's disease, progressive supranuclear palsy, Lewy body dementia, and stroke) using P-significant/gene-annotated SNPs were included in the model at the same time.

**Supplementary Table 2.** Full featured risk SNPs from the best-performing Elastic Net SNP model, UCLA ATLAS sample, stratified by genetic ancestry

| No.                                            | rsID        | CHR | POS       | Variable Importance  | Nearest Gene  | Distance | Function       | CADD  | Position Map | eQTL Map | CI Map | AD EUR | AD AFR | AD trans | LBD | PD | PSP | STROKE |
|------------------------------------------------|-------------|-----|-----------|----------------------|---------------|----------|----------------|-------|--------------|----------|--------|--------|--------|----------|-----|----|-----|--------|
| <b>Hispanic/Latino American ancestry (HLA)</b> |             |     |           |                      |               |          |                |       |              |          |        |        |        |          |     |    |     |        |
| 1                                              | rs429358    | 19  | 44908684  | 0.089 (0.02, 0.11)   | APOE          | 0        | exonic         | 12.64 | 1            | 0        | 1      |        | x      |          |     |    |     |        |
| 2                                              | rs2075650   | 19  | 44892362  | 0.089 (0.02, 0.11)   | TOMM40        | 0        | intronic       | 7.974 | 1            | 0        | 1      |        | x      |          | x   |    |     |        |
| 3                                              | rs483082    | 19  | 44912921  | 0.07 (0.017, 0.086)  | APOC1         | 1325     | intergenic     | 11.01 | 1            | 0        | 1      |        | x      |          | x   |    |     |        |
| 4                                              | rs157581    | 19  | 44892457  | 0.065 (0.014, 0.079) | TOMM40        | 0        | exonic         | 21.1  | 1            | 0        | 1      |        | x      |          |     | x  |     |        |
| 5                                              | rs412776    | 19  | 44876259  | 0.057 (0.016, 0.066) | NECTIN2       | 0        | intronic       | 12.66 | 1            | 0        | 0      | x      |        |          | x   |    |     |        |
| 6                                              | rs62120578  | 19  | 44713297  | 0.053 (0.022, 0.061) | CTB-171A8.1   | 0        | ncRNA_intronic | 12.82 | 1            | 0        | 0      | x      |        |          |     |    |     |        |
| 7                                              | rs4803765   | 19  | 44855191  | 0.048 (0.015, 0.056) | NECTIN2       | 0        | intronic       | 1.401 | 1            | 0        | 0      | x      |        |          |     |    |     |        |
| 8                                              | rs80100206  | 4   | 705856    | 0.042 (0.02, 0.046)  | PCGF3         | 0        | UTR5           | 19.73 | 1            | 1        | 0      |        |        |          |     |    |     | x      |
| 9                                              | rs6857      | 19  | 44888997  | 0.038 (0.011, 0.042) | NECTIN2       | 0        | ncRNA_intronic | 5.597 | 1            | 0        | 1      |        | x      |          |     |    |     |        |
| 10                                             | rs2276412   | 11  | 121590137 | 0.037 (0.018, 0.039) | SORL1         | 0        | exonic         | 14.94 | 1            | 0        | 0      | x      |        |          |     |    |     |        |
| 11                                             | rs2220427   | 4   | 110793733 | 0.033 (0.019, 0.035) | RP11-777N19.1 | 0:00     | upstream       | 20.4  | 1            | 0        | 0      |        |        |          |     |    |     | x      |
| 12                                             | rs117783785 | 19  | 45195929  | 0.03 (0.016, 0.032)  | BLOC1S3       | 0        | intronic       | 6.441 | 1            | 0        | 0      | x      |        |          |     |    |     |        |
| 13                                             | rs7026      | 19  | 44821259  | 0.027 (0.013, 0.029) | BCAM          | 0        | UTR3           | 11.62 | 1            | 0        | 0      | x      |        |          | x   |    |     |        |
| 14                                             | rs80335384  | 17  | 45321252  | 0.027 (0.017, 0.029) | MAP3K14       | 4203     | intergenic     | 9.95  | 1            | 1        | 1      |        |        |          |     |    |     | x      |
| 15                                             | rs2627641   | 19  | 45205500  | 0.026 (0.014, 0.028) | BLOC1S3       | 0:00:00  | intronic       | 11.65 | 1            | 0        | 0      | x      |        |          |     |    |     |        |
| 16                                             | rs435380    | 19  | 44903861  | 0.025 (0.014, 0.028) | TOMM40        | 171      | downstream     | 9.048 | 1            | 1        | 0      |        | x      |          | x   |    |     |        |
| 17                                             | rs13067212  | 3   | 39404095  | 0.025 (0.018, 0.028) | RPSA          | 2593     | intergenic     | 13.8  | 1            | 1        | 0      |        |        |          |     |    |     | x      |
| 18                                             | rs1551890   | 19  | 44829875  | 0.025 (0.01, 0.028)  | BCAM          | 8458     | intergenic     | 8.368 | 1            | 0        | 0      | x      |        |          | x   |    |     |        |
| 19                                             | rs10422350  | 19  | 44725238  | 0.023 (0.016, 0.026) | snoZ6         | 745      | downstream     | 13.12 | 1            | 0        | 0      | x      |        |          | x   |    |     |        |
| 20                                             | rs7613      | 17  | 45394115  | 0.02 (0.016, 0.024)  | ARHGAP27      | 0        | UTR3           | 15.45 | 1            | 1        | 1      |        |        |          |     |    |     | x      |
| 21                                             | rs56870644  | 19  | 11065610  | 0.019 (0.016, 0.023) | SMARCA4       | 214      | downstream     | 11.62 | 1            | 0        | 0      |        |        |          |     |    |     | x      |
| 22                                             | rs76692773  | 19  | 44890954  | 0.019 (0.013, 0.023) | TOMM40        | 0:00     | intronic       | 7.614 | 1            | 0        | 1      | x      |        |          | x   |    |     |        |
| 23                                             | rs35929607  | 2   | 168179226 | 0.012 (0.007, 0.019) | STK39         | 0        | intronic       | 16.92 | 1            | 0        | 1      |        |        |          |     |    |     | x      |
| 24                                             | rs17030651  | 1   | 112696760 | 0.012 (0.006, 0.018) | MOV10         | 0        | exonic         | 19.29 | 1            | 1        | 0      |        |        |          |     |    |     | x      |
| 25                                             | rs11223641  | 11  | 133950127 | 0.011 (0.004, 0.018) | IGSF9B        | 0        | intronic       | 10.74 | 1            | 0        | 1      |        |        |          |     |    |     | x      |
| 26                                             | rs10401176  | 19  | 44750234  | 0.009 (0.002, 0.018) | BCL3          | 0        | intronic       | 13.68 | 1            | 0        | 0      | x      |        |          | x   |    |     |        |
| 27                                             | rs2619363   | 4   | 89837896  | 0.006 (0.003, 0.014) | SNCA          | 0        | ncRNA_intronic | 21.6  | 1            | 1        | 0      |        |        |          | x   |    | x   |        |
| 28                                             | rs28399637  | 19  | 44820881  | 0.004 (0, 0.012)     | BCAM          | 0        | intronic       | 0.114 | 1            | 0        | 0      | x      |        |          | x   |    | x   |        |
| <b>African American ancestry (AA)</b>          |             |     |           |                      |               |          |                |       |              |          |        |        |        |          |     |    |     |        |
| 1                                              | rs2627641   | 19  | 45205500  | 0.096 (0.077, 0.099) | BLOC1S3       | 0:00     | intronic       | 11.65 | 1            | 0        | 0      | x      |        |          |     |    |     |        |
| 2                                              | rs8073976   | 17  | 44955857  | 0.079 (0.065, 0.082) | CIQL1         | 3835     | intergenic     | 16.04 | 1            | 1        | 1      |        |        |          |     |    |     | x      |
| 3                                              | rs77283277  | 7   | 143386852 | 0.076 (0.063, 0.079) | ZYX           | 0        | intronic       | 5.616 | 1            | 1        | 1      | x      |        |          |     |    |     |        |
| 4                                              | rs429358    | 19  | 44908684  | 0.071 (0.059, 0.074) | APOE          | 0        | exonic         | 12.64 | 1            | 0        | 1      |        | x      |          |     |    |     |        |
| 5                                              | rs2075650   | 19  | 44892362  | 0.068 (0.056, 0.071) | TOMM40        | 0        | intronic       | 7.974 | 1            | 0        | 1      |        | x      |          | x   |    |     |        |
| 6                                              | rs73936967  | 19  | 44890485  | 0.064 (0.053, 0.066) | TOMM40        | 0        | ncRNA_intronic | 22    | 1            | 0        | 1      |        | x      |          |     |    |     |        |
| 7                                              | rs13032148  | 2   | 127107524 | 0.063 (0.053, 0.065) | BIN1          | 168      | upstream       | 7.853 | 1            | 0        | 0      | x      |        |          |     | x  |     |        |
| 8                                              | rs71352239  | 19  | 44926286  | 0.056 (0.047, 0.057) | APOC1P1       | 517      | upstream       | 5.237 | 1            | 1        | 1      | x      |        |          |     | x  |     |        |
| 9                                              | rs435380    | 19  | 44903861  | 0.041 (0.037, 0.042) | TOMM40        | 171      | downstream     | 9.048 | 1            | 1        | 0      |        | x      |          | x   |    |     |        |
| 10                                             | rs11223641  | 11  | 133950127 | 0.041 (0.037, 0.041) | IGSF9B        | 0        | intronic       | 10.74 | 1            | 0        | 1      |        |        |          |     |    |     | x      |
| 11                                             | rs2238682   | 19  | 44955336  | 0.036 (0.033, 0.036) | CLPTM1        | 0        | UTR5           | 17.4  | 1            | 1        | 1      | x      |        |          |     | x  |     |        |
| 12                                             | rs73572039  | 19  | 44839373  | 0.034 (0.032, 0.034) | NECTIN2       | 6801     | intergenic     | 4.628 | 1            | 0        | 0      |        |        |          | x   |    |     |        |
| 13                                             | rs3800298   | 6   | 43284291  | 0.033 (0.032, 0.034) | TTBK1         | 0        | exonic         | 15.75 | 1            | 0        | 0      |        |        |          |     |    |     | x      |
| 14                                             | rs28399635  | 19  | 44819986  | 0.028 (0.027, 0.028) | BCAM          | 0        | UTR3           | 4.212 | 1            | 0        | 0      | x      |        |          |     | x  |     |        |
| 15                                             | rs4803791   | 19  | 45020325  | 0.023 (0.022, 0.024) | RELB          | 0        | intronic       | 7.817 | 1            | 1        | 1      | x      |        |          |     | x  |     |        |
| 16                                             | rs41289510  | 19  | 44844379  | 0.022 (0.021, 0.023) | NECTIN2       | 1795     | intergenic     | 3.223 | 1            | 0        | 0      | x      |        |          |     | x  |     |        |
| 17                                             | rs2889414   | 19  | 44794671  | 0.02 (0.018, 0.022)  | CBLC          | 0:00     | intronic       | 3.046 | 1            | 1        | 0      | x      |        |          |     | x  |     |        |
| 18                                             | rs75178253  | 19  | 44957750  | 0.02 (0.018, 0.022)  | CLPTM1        | 0        | intronic       | 0.32  | 1            | 0        | 1      | x      |        |          |     | x  |     |        |
| 19                                             | rs3810143   | 19  | 44846145  | 0.018 (0.016, 0.02)  | NECTIN2       | 29       | upstream       | 8.297 | 1            | 0        | 0      | x      |        |          |     | x  |     |        |

|    |            |    |           |                      |                      |      |                |       |   |   |   |   |   |   |  |   |   |
|----|------------|----|-----------|----------------------|----------------------|------|----------------|-------|---|---|---|---|---|---|--|---|---|
| 20 | rs4263041  | 19 | 44935386  | 0.014 (0.013, 0.016) | <i>APOC1P1</i>       | 3999 | intergenic     | 2.278 | 1 | 0 | 1 | x |   |   |  |   |   |
| 21 | rs76692773 | 19 | 44890954  | 0.012 (0.012, 0.015) | <i>TOMM40</i>        | 0    | intronic       | 7.614 | 1 | 0 | 1 | x | x | x |  |   |   |
| 22 | rs166907   | 19 | 44883598  | 0.01 (0.009, 0.013)  | <i>NECTIN2</i>       | 0    | ncRNA_intronic | 3.815 | 1 | 0 | 0 |   | x | x |  |   |   |
| 23 | rs62330386 | 4  | 154525388 | 0.009 (0.009, 0.014) | <i>RPI1-158C21.2</i> | 580  | downstream     | 5.44  | 1 | 0 | 0 |   |   |   |  |   | x |
| 24 | rs12981508 | 19 | 44855243  | 0.009 (0.008, 0.013) | <i>NECTIN2</i>       | 0    | intronic       | 1.322 | 1 | 0 | 0 | x |   | x |  |   |   |
| 25 | rs13067212 | 3  | 39404095  | 0.008 (0.007, 0.014) | <i>RPSA</i>          | 2593 | intergenic     | 13.8  | 1 | 1 | 0 |   |   |   |  |   | x |
| 26 | rs71352248 | 19 | 44999245  | 0.008 (0.007, 0.013) | <i>RELB</i>          | 2184 | intergenic     | 15.03 | 1 | 0 | 0 | x |   |   |  |   |   |
| 27 | rs76738189 | 19 | 45216235  | 0.007 (0.007, 0.013) | <i>EXOC3L2</i>       | 0    | intronic       | 3.762 | 1 | 0 | 0 | x |   |   |  |   |   |
| 28 | rs157581   | 19 | 44892457  | 0.007 (0.006, 0.011) | <i>TOMM40</i>        | 0    | exonic         | 21.1  | 1 | 0 | 1 |   | x |   |  | x |   |
| 29 | rs3852860  | 19 | 44879709  | 0.007 (0.006, 0.012) | <i>NECTIN2</i>       | 0    | intronic       | 4.255 | 1 | 0 | 0 | x |   | x |  |   |   |
| 30 | rs73936968 | 19 | 44892559  | 0.004 (0.003, 0.011) | <i>TOMM40</i>        | 0    | intronic       | 8.817 | 1 | 0 | 1 | x |   |   |  |   |   |
| 31 | rs2304933  | 11 | 60335034  | 0.002 (0.001, 0.009) | <i>MS4A6E</i>        | 0    | exonic         | 17.97 | 1 | 0 | 0 | x |   |   |  |   |   |

Abbreviations: AD, Alzheimer's Disease; AFR, African American; CI, confidence interval; EUR, European; LBD, Lewy body dementia; PD, Parkinson's disease; PRS, Polygenic Risk Score; PSP, progressive supranuclear palsy; SNP, Single-Nucleotide Polymorphism. Note: SNPs marked in red are overlapped SNPs identified by both samples.

**Supplementary Table 3.** Mapped genes of selected risk SNPs from the best-performing Elastic Net SNP model, UCLA ATLAS sample, by genetic inferred ancestry

| Hispanic Latino Americans (HLA) |                 |                      |     |           |           |                      |        |                     |       |
|---------------------------------|-----------------|----------------------|-----|-----------|-----------|----------------------|--------|---------------------|-------|
| No                              | Gene            | Symbol               | CHR | Start     | End       | Type                 | posMap | eqtlMap (Direction) | ciMap |
| 1                               | ENSG00000134245 | <i>WNT2B</i>         | 1   | 113009163 | 113072787 | protein_coding       | No     | Yes (+)             | No    |
| 2                               | ENSG0000007341  | <i>ST7L</i>          | 1   | 113066140 | 113163447 | protein_coding       | No     | Yes (+)             | No    |
| 3                               | ENSG00000155363 | <i>MOV10</i>         | 1   | 113215763 | 113243368 | protein_coding       | Yes    | No                  | No    |
| 4                               | ENSG00000198648 | <i>STK39</i>         | 2   | 168810530 | 169104651 | protein_coding       | Yes    | No                  | Yes   |
| 5                               | ENSG00000144659 | <i>SLC25A38</i>      | 3   | 39424839  | 39438842  | protein_coding       | No     | Yes (+)             | No    |
| 6                               | ENSG00000168028 | <i>RPSA</i>          | 3   | 39448180  | 39454033  | protein_coding       | Yes    | Yes (+)             | No    |
| 7                               | ENSG00000185619 | <i>PCGF3</i>         | 4   | 699537    | 764428    | protein_coding       | Yes    | Yes (-)             | No    |
| 8                               | ENSG00000247775 | <i>RP11-67M1.1</i>   | 4   | 90757559  | 90763129  | antisense            | No     | Yes (-)             | No    |
| 9                               | ENSG00000247775 | <i>RP11-67M1.1</i>   | 4   | 90757559  | 90763129  | antisense            | No     | Yes (+)             | No    |
| 10                              | ENSG00000249519 | <i>RP11-777N19.1</i> | 4   | 111715559 | 111718500 | lincRNA              | Yes    | No                  | No    |
| 11                              | ENSG00000137642 | <i>SORL1</i>         | 11  | 121322912 | 121504402 | protein_coding       | Yes    | No                  | No    |
| 12                              | ENSG00000080854 | <i>IGSF9B</i>        | 11  | 133778459 | 133826880 | protein_coding       | Yes    | No                  | No    |
| 13                              | ENSG00000255406 | <i>RP11-713P17.5</i> | 11  | 133896882 | 133898013 | lincRNA              | No     | No                  | Yes   |
| 14                              | ENSG00000166086 | <i>JAM3</i>          | 11  | 133938820 | 134021896 | protein_coding       | No     | No                  | Yes   |
| 15                              | ENSG00000254481 | <i>PTPA2P2</i>       | 11  | 133993723 | 133994224 | pseudogene           | No     | No                  | Yes   |
| 16                              | ENSG00000180329 | <i>CCDC43</i>        | 17  | 42750437  | 42767147  | protein_coding       | No     | No                  | Yes   |
| 17                              | ENSG00000184922 | <i>FMNL1</i>         | 17  | 43298811  | 43324687  | protein_coding       | No     | Yes (+)             | No    |
| 18                              | ENSG00000184361 | <i>SPATA32</i>       | 17  | 43331760  | 43339479  | protein_coding       | No     | No                  | Yes   |
| 19                              | ENSG00000060602 | <i>MAP3K14</i>       | 17  | 43340488  | 43394414  | processed_transcript | Yes    | No                  | Yes   |
| 20                              | ENSG00000267446 | <i>CTB-39G8.2</i>    | 17  | 43448768  | 43449423  | lincRNA              | No     | No                  | Yes   |
| 21                              | ENSG00000159314 | <i>ARHGAP27</i>      | 17  | 43471275  | 43511787  | protein_coding       | Yes    | Yes (+)             | No    |
| 22                              | ENSG00000159314 | <i>ARHGAP27</i>      | 17  | 43471275  | 43511787  | protein_coding       | Yes    | Yes (-)             | No    |
| 23                              | ENSG00000267344 | <i>CTB-39G8.3</i>    | 17  | 43474298  | 43474843  | antisense            | No     | No                  | Yes   |
| 24                              | ENSG00000225190 | <i>PLEKHM1</i>       | 17  | 43513266  | 43568115  | protein_coding       | No     | Yes (+)             | No    |
| 25                              | ENSG00000214425 | <i>LRR37A4P</i>      | 17  | 43578685  | 43627701  | pseudogene           | No     | Yes (+)             | No    |
| 26                              | ENSG00000264070 | <i>DND1P1</i>        | 17  | 43663237  | 43664295  | pseudogene           | No     | Yes (-)             | No    |
| 27                              | ENSG00000263503 | <i>RP11-707O23.5</i> | 17  | 43678235  | 43679706  | pseudogene           | No     | Yes (-)             | No    |
| 28                              | ENSG00000204650 | <i>CRHRI-IT1</i>     | 17  | 43697694  | 43725582  | pseudogene           | No     | Yes (-)             | No    |
| 29                              | ENSG00000185294 | <i>SPPL2C</i>        | 17  | 43922256  | 43924438  | protein_coding       | No     | Yes (-)             | No    |
| 30                              | ENSG00000214401 | <i>KANSL1-AS1</i>    | 17  | 44270942  | 44274089  | antisense            | No     | Yes (-)             | No    |
| 31                              | ENSG00000262500 | <i>RP11-259G18.2</i> | 17  | 44320972  | 44322410  | pseudogene           | No     | Yes (-)             | No    |
| 32                              | ENSG00000262539 | <i>RP11-259G18.3</i> | 17  | 44336917  | 44337972  | pseudogene           | No     | Yes (-)             | No    |
| 33                              | ENSG00000261575 | <i>RP11-259G18.1</i> | 17  | 44344403  | 44346060  | pseudogene           | No     | Yes (-)             | Yes   |
| 34                              | ENSG00000127616 | <i>SMARCA4</i>       | 19  | 11071598  | 11176071  | protein_coding       | Yes    | No                  | No    |
| 35                              | ENSG00000266903 | <i>CTB-171A8.1</i>   | 19  | 45135500  | 45222031  | antisense            | Yes    | No                  | No    |
| 36                              | ENSG00000252200 | <i>snoZ6</i>         | 19  | 45229248  | 45229322  | snoRNA               | Yes    | No                  | No    |
| 37                              | ENSG00000069399 | <i>BCL3</i>          | 19  | 45250962  | 45263301  | protein_coding       | Yes    | No                  | No    |
| 38                              | ENSG00000187244 | <i>BCAM</i>          | 19  | 45312328  | 45324673  | protein_coding       | Yes    | No                  | No    |
| 39                              | ENSG00000130202 | <i>PVRL2</i>         | 19  | 45349432  | 45392485  | protein_coding       | Yes    | No                  | No    |
| 40                              | ENSG00000130204 | <i>TOMM40</i>        | 19  | 45393826  | 45406946  | protein_coding       | Yes    | No                  | No    |
| 41                              | ENSG00000130203 | <i>APOE</i>          | 19  | 45409011  | 45412650  | protein_coding       | Yes    | Yes (-)             | No    |
| 42                              | ENSG00000130208 | <i>APOC1</i>         | 19  | 45417504  | 45422606  | protein_coding       | Yes    | No                  | No    |
| 43                              | ENSG00000214855 | <i>APOC1P1</i>       | 19  | 45430061  | 45434643  | pseudogene           | No     | No                  | Yes   |
| 44                              | ENSG00000104859 | <i>CLASRP</i>        | 19  | 45542298  | 45574214  | protein_coding       | No     | No                  | Yes   |
| African Americans (AA)          |                 |                      |     |           |           |                      |        |                     |       |
| No                              | Gene            | Symbol               | CHR | Start     | End       | Type                 | posMap | eqtlMap (Direction) | ciMap |
| 1                               | ENSG00000136717 | <i>BINI</i>          | 2   | 127805603 | 127864931 | protein_coding       | Yes    | No                  | No    |
| 2                               | ENSG00000144659 | <i>SLC25A38</i>      | 3   | 39424839  | 39438842  | protein_coding       | No     | Yes (+)             | No    |
| 3                               | ENSG00000168028 | <i>RPSA</i>          | 3   | 39448180  | 39454033  | protein_coding       | Yes    | Yes (+)             | No    |
| 4                               | ENSG00000250609 | <i>RP11-158C21.2</i> | 4   | 155444639 | 155445959 | pseudogene           | Yes    | No                  | No    |
| 5                               | ENSG00000146216 | <i>TBKB1</i>         | 6   | 43211418  | 43255997  | protein_coding       | Yes    | No                  | No    |
| 6                               | ENSG00000159840 | <i>ZYX</i>           | 7   | 143078173 | 143088204 | protein_coding       | Yes    | No                  | No    |
| 7                               | ENSG00000050327 | <i>ARHGFE5</i>       | 7   | 144052381 | 144077725 | protein_coding       | No     | Yes (+)             | No    |
| 8                               | ENSG00000166926 | <i>MS4A6E</i>        | 11  | 60102304  | 60164069  | protein_coding       | Yes    | No                  | No    |
| 9                               | ENSG00000080854 | <i>IGSF9B</i>        | 11  | 133778459 | 133826880 | protein_coding       | Yes    | No                  | No    |
| 10                              | ENSG00000255406 | <i>RP11-713P17.5</i> | 11  | 133896882 | 133898013 | lincRNA              | No     | No                  | Yes   |
| 11                              | ENSG00000166086 | <i>JAM3</i>          | 11  | 133938820 | 134021896 | protein_coding       | No     | No                  | Yes   |
| 12                              | ENSG00000254481 | <i>PTPA2P2</i>       | 11  | 133993723 | 133994224 | pseudogene           | No     | No                  | Yes   |
| 13                              | ENSG00000180329 | <i>CCDC43</i>        | 17  | 42750437  | 42767147  | protein_coding       | No     | No                  | Yes   |
| 14                              | ENSG00000161692 | <i>DBF4B</i>         | 17  | 42785976  | 42829632  | protein_coding       | No     | Yes (-)             | No    |
| 15                              | ENSG00000073670 | <i>ADAM11</i>        | 17  | 42836399  | 42859214  | protein_coding       | No     | No                  | Yes   |
| 16                              | ENSG00000131095 | <i>GFAP</i>          | 17  | 42982376  | 42994305  | protein_coding       | No     | No                  | Yes   |
| 17                              | ENSG00000131094 | <i>CIQL1</i>         | 17  | 43037061  | 43045439  | protein_coding       | Yes    | Yes (+)             | No    |
| 18                              | ENSG00000267788 | <i>CTD-2534I21.9</i> | 17  | 43059882  | 43060140  | lincRNA              | No     | No                  | Yes   |
| 19                              | ENSG00000266903 | <i>CTB-171A8.1</i>   | 19  | 45135500  | 45222031  | antisense            | No     | Yes (+)             | No    |
| 20                              | ENSG00000142273 | <i>CBLC</i>          | 19  | 45281126  | 45303891  | protein_coding       | Yes    | No                  | No    |
| 21                              | ENSG00000187244 | <i>BCAM</i>          | 19  | 45312328  | 45324673  | protein_coding       | Yes    | No                  | No    |
| 22                              | ENSG00000130202 | <i>PVRL2</i>         | 19  | 45349432  | 45392485  | protein_coding       | Yes    | No                  | No    |
| 23                              | ENSG00000267282 | <i>CTB-129P6.4</i>   | 19  | 45385284  | 45394133  | antisense            | Yes    | No                  | No    |
| 24                              | ENSG00000130204 | <i>TOMM40</i>        | 19  | 45393826  | 45406946  | protein_coding       | Yes    | No                  | No    |
| 25                              | ENSG00000130203 | <i>APOE</i>          | 19  | 45409011  | 45412650  | protein_coding       | Yes    | Yes (-)             | No    |
| 26                              | ENSG00000130208 | <i>APOC1</i>         | 19  | 45417504  | 45422606  | protein_coding       | No     | No                  | Yes   |
| 27                              | ENSG00000214855 | <i>APOC1P1</i>       | 19  | 45430061  | 45434643  | pseudogene           | Yes    | Yes (+)             | Yes   |
| 28                              | ENSG00000234906 | <i>APOC2</i>         | 19  | 45449243  | 45452822  | protein_coding       | No     | Yes (+)             | No    |
| 29                              | ENSG00000104853 | <i>CLPTM1</i>        | 19  | 45457842  | 45496599  | protein_coding       | Yes    | No                  | No    |
| 30                              | ENSG00000104856 | <i>RELB</i>          | 19  | 45504688  | 45514552  | protein_coding       | Yes    | No                  | No    |
| 31                              | ENSG00000104859 | <i>CLASRP</i>        | 19  | 45542298  | 45574214  | protein_coding       | No     | No                  | Yes   |
| 32                              | ENSG00000267045 | <i>AC006126.4</i>    | 19  | 45741890  | 45748628  | lincRNA              | No     | No                  | Yes   |

**Supplementary Table 4A.** Descriptive statistics of demographic and electronic health record features by case/control groups, UCLA ATLAS sample (East Asian American ancestry group, N = 673)

|                            | <b>Cases</b>      | <b>Controls</b>   | <b>P value</b> |
|----------------------------|-------------------|-------------------|----------------|
| N                          | 75                | 598               | -              |
| Age                        | 80.1 (73.2, 83.5) | 76.3 (72.9, 80.7) | 0.04*          |
| Sex (Female)               | 48 (64%)          | 325 (54%)         | 0.11           |
| Span of records (in yrs)   | 5.3 (2.7, 7.8)    | 9.8 (8.0, 12.0)   | <0.001*        |
| Encounters per year        | 17 (9, 28)        | 12 (7, 18)        | 0.002*         |
| Number of encounters       | 73 (23, 137)      | 121 (68, 185)     | <0.001*        |
| Number of unique diagnosis | 64 (35, 92)       | 60 (38, 90)       | 0.80           |

*Abbreviations: EHR, electronic health record.*

**Notes:** Continuous variables were reported as median (IQR), and categorical variables were reported as n (%). P-values were calculated based on Wilcoxon rank sum test or Pearson's Chi-squared test as appropriate. \* Statistical significant at level 0.05.

**Supplementary Table 4B.** Model performance of *APOE-ε4* count, polygenic risk score, and Elastic Net SNP models in dementia genetic prediction, UCLA ATLAS sample (East Asian American ancestry group, N = 673)<sup>a</sup>

|                                                |                | AUPRC        | AUROC        | F1 score     | Accuracy     | Precision    | Recall       | Specificity  |
|------------------------------------------------|----------------|--------------|--------------|--------------|--------------|--------------|--------------|--------------|
| <b>APOE</b>                                    | ε4 count       | 0.238        | 0.712        | 0.347        | 0.782        | 0.260        | 0.520        | 0.814        |
| <b>AD-PRS models</b>                           |                |              |              |              |              |              |              |              |
| <b>AD EUR PRS</b>                              | P-significant  | 0.222        | 0.681        | 0.252        | 0.877        | <b>0.389</b> | 0.187        | <b>0.963</b> |
|                                                | Gene-annotated | 0.215        | 0.676        | 0.262        | 0.866        | 0.340        | 0.213        | 0.948        |
| <b>AD AFR PRS</b>                              | P-significant  | 0.234        | 0.706        | 0.336        | 0.765        | 0.245        | 0.533        | 0.794        |
|                                                | Gene-annotated | 0.230        | 0.700        | 0.331        | 0.765        | 0.242        | 0.520        | 0.796        |
| <b>AD multi-ancestry PRS</b>                   | P-significant  | 0.236        | 0.702        | 0.316        | 0.730        | 0.220        | 0.560        | 0.751        |
|                                                | Gene-annotated | 0.232        | 0.696        | 0.318        | 0.796        | 0.254        | 0.427        | 0.843        |
| <b>Multi-PRS models</b>                        |                |              |              |              |              |              |              |              |
| <b>PRSs using AD GWASs only<sup>b</sup></b>    | P-significant  | 0.234        | 0.699        | 0.327        | 0.731        | 0.227        | 0.587        | 0.749        |
|                                                | Gene-annotated | 0.229        | 0.700        | 0.338        | 0.779        | 0.253        | 0.507        | 0.813        |
| <b>PRSs using AD + Neuro GWASs<sup>c</sup></b> | P-significant  | 0.234        | 0.704        | 0.338        | 0.796        | 0.265        | 0.467        | 0.838        |
|                                                | Gene-annotated | 0.224        | 0.706        | 0.346        | 0.770        | 0.253        | 0.547        | 0.798        |
| <b>Elastic Net SNPs models</b>                 |                |              |              |              |              |              |              |              |
| <b>SNPs from AD GWASs only</b>                 | P-significant  | 0.234        | 0.706        | 0.350        | 0.774        | 0.258        | 0.547        | 0.803        |
|                                                | Gene-annotated | 0.256        | 0.743        | 0.338        | 0.685        | 0.220        | 0.720        | 0.681        |
| <b>SNPs from AD + Neuro GWASs</b>              | P-significant  | 0.271        | 0.748        | 0.366        | 0.835        | 0.320        | 0.427        | 0.886        |
|                                                | Gene-annotated | <b>0.338</b> | <b>0.793</b> | <b>0.443</b> | <b>0.840</b> | 0.361        | 0.573        | 0.873        |
| <b>Non-linear SNPs models</b>                  |                |              |              |              |              |              |              |              |
| <b>SNPs from AD + Neuro GWASs</b>              | GBM            | 0.113        | 0.511        | 0.219        | 0.416        | 0.129        | <b>0.733</b> | 0.376        |
| <b>Gene-annotated SNPs</b>                     | XGBoost        | 0.206        | 0.673        | 0.300        | 0.660        | 0.194        | 0.653        | 0.661        |

Abbreviations: AD, Alzheimer's Disease; APOE, apolipoprotein E; AUROC, Area Under the ROC Curve; AUPRC, Area Under the Precision-Recall Curve; EUR, European; GBM, Gradient Boosting Machine; GWAS, Genome-Wide Association Study; PRS, Polygenic Risk Score; SNP, Single-Nucleotide Polymorphism.

**Notes:**

[a] All models (if not other specified) have regressed out age, sex, and ancestry-specific principal components. Thresholds were determined by maximizing absolute Matthews correlation coefficient.

[b] All AD PRSs built with EUR, AFR, and multi-ancestry GWASs using P-significant/gene-annotated SNPs were included in the model at the same time.

[c] All AD PRSs built with EUR, AFR, and multi-ancestry GWASs, and neurodegenerative disease PRS (Parkinson's disease, progressive supranuclear palsy, Lewy body dementia, and stroke) using P-significant/gene-annotated SNPs were included in the model at the same time.

**Supplementary Table 4C.** Selected risk SNPs from the best-performing Elastic Net SNP model, UCLA ATLAS sample (East Asian American ancestry group, N = 673)

| rsID             | CHR | POS       | Variable Importance<br>(percentage, 95% CI) | Nearest Gene         | AD<br>EUR | AD<br>AFR | AD<br>multi | LBD | PD | PSP | Stroke |
|------------------|-----|-----------|---------------------------------------------|----------------------|-----------|-----------|-------------|-----|----|-----|--------|
| rs429358         | 19  | 44908684  | 0.205 (0.151, 0.214)                        | <i>APOE</i>          |           | x         |             |     |    |     |        |
| rs66626994       | 19  | 44924977  | 0.133 (0.104, 0.137)                        | <i>APOC1P1</i>       |           |           | x           | x   |    |     |        |
| rs6857           | 19  | 44888997  | 0.118 (0.095, 0.122)                        | <i>NECTIN2</i>       |           | x         |             |     |    |     |        |
| rs2075650        | 19  | 44892362  | 0.101 (0.084, 0.104)                        | <i>TOMM40</i>        |           | x         | x           | x   |    |     |        |
| rs483082         | 19  | 44912921  | 0.092 (0.078, 0.094)                        | <i>APOC1</i>         |           | x         | x           |     |    |     |        |
| rs35106910       | 19  | 44781009  | 0.079 (0.07, 0.081)                         | <i>CBLC</i>          | x         |           |             |     |    |     |        |
| rs1105568        | 17  | 45716061  | 0.05 (0.049, 0.051)                         | <i>CRHR1</i>         |           |           |             |     |    |     | x      |
| rs76738189       | 19  | 45216235  | 0.049 (0.049, 0.051)                        | <i>EXOC3L2</i>       | x         |           |             |     |    |     |        |
| rs34096562       | 8   | 16843772  | 0.047 (0.046, 0.049)                        | <i>RP11-13N12.1</i>  |           |           |             |     | x  |     |        |
| rs7932740        | 11  | 60208638  | 0.029 (0.028, 0.038)                        | <i>MS4A4E</i>        | x         |           | x           |     |    |     |        |
| rs11724804       | 4   | 971991    | 0.021 (0.019, 0.032)                        | <i>DGKQ</i>          |           |           |             | x   | x  |     |        |
| rs13067212       | 3   | 39404095  | 0.019 (0.017, 0.031)                        | <i>RPSA</i>          |           |           |             |     |    |     | x      |
| rs7613           | 17  | 45394115  | 0.018 (0.016, 0.03)                         | <i>ARHGAP27</i>      |           |           |             |     |    |     | x      |
| chr1:207368589:D | 1   | 207195244 | 0.015 (0.012, 0.028)                        | <i>RP11-164O23.7</i> | x         |           |             |     |    |     |        |
| rs59193782       | 17  | 45357199  | 0.01 (0.008, 0.025)                         | <i>CTB-39G8.2</i>    |           |           |             |     |    |     | x      |
| rs10769263       | 11  | 47395632  | 0.007 (0.004, 0.023)                        | <i>RP11-750H9.5</i>  | x         |           |             |     |    |     |        |

Abbreviations: AD, Alzheimer's Disease; AFR, African American; CI, confidence interval; EUR, European; LBD, Lewy body dementia; PD, Parkinson's disease; PRS, Polygenic Risk Score; PSP, progressive supranuclear palsy; SNP, Single-Nucleotide Polymorphism.



**Supplementary Table 4D.** Mapped genes of selected risk SNPs from the best-performing Elastic Net SNP model, UCLA ATLAS sample (East Asian American ancestry group, N = 673)

| No | Gene            | Symbol               | CHR | Start     | End       | Type                 | posMap | eqtlMap (Direction) | ciMap |
|----|-----------------|----------------------|-----|-----------|-----------|----------------------|--------|---------------------|-------|
| 1  | ENSG00000203710 | <i>CRI</i>           | 1   | 207669492 | 207813992 | protein_coding       | No     | Yes (+)             | No    |
| 2  | ENSG00000127419 | <i>TMEM175</i>       | 4   | 926175    | 952444    | protein_coding       | No     | Yes (-)             | No    |
| 3  | ENSG00000145214 | <i>DGKQ</i>          | 4   | 952675    | 980683    | protein_coding       | Yes    | Yes (-)             | No    |
| 4  | ENSG00000145217 | <i>SLC26A1</i>       | 4   | 972861    | 987228    | protein_coding       | No     | Yes (+)             | No    |
| 5  | ENSG00000253496 | <i>RP11-13N12.1</i>  | 8   | 16534414  | 16772553  | lincRNA              | Yes    | No                  | No    |
| 6  | ENSG00000175220 | <i>ARHGAP1</i>       | 11  | 46698630  | 46722165  | protein_coding       | No     | Yes (+)             | No    |
| 7  | ENSG00000255197 | <i>RP11-750H9.5</i>  | 11  | 47404699  | 47430741  | antisense            | Yes    | Yes (-)             | No    |
| 8  | ENSG00000165915 | <i>SLC39A13</i>      | 11  | 47428683  | 47438047  | protein_coding       | No     | Yes (-)             | No    |
| 9  | ENSG00000213619 | <i>NDUFS3</i>        | 11  | 47586888  | 47606114  | protein_coding       | No     | Yes (-)             | No    |
| 10 | ENSG00000196666 | <i>FAM180B</i>       | 11  | 47608198  | 47610746  | protein_coding       | No     | Yes (-)             | No    |
| 11 | ENSG00000184922 | <i>FMNL1</i>         | 17  | 43298811  | 43324687  | protein_coding       | No     | Yes (+)             | No    |
| 12 | ENSG00000233175 | <i>CTD-2020K17.3</i> | 17  | 43315395  | 43319101  | antisense            | No     | Yes (+)             | No    |
| 13 | ENSG00000006062 | <i>MAP3K14</i>       | 17  | 43340488  | 43394414  | processed_transcript | No     | No                  | Yes   |
| 14 | ENSG00000199953 | <i>RNA5SP443</i>     | 17  | 43404732  | 43404863  | rRNA                 | Yes    | No                  | No    |
| 15 | ENSG00000267446 | <i>CTB-39G8.2</i>    | 17  | 43448768  | 43449423  | lincRNA              | Yes    | No                  | No    |
| 16 | ENSG00000159314 | <i>ARHGAP27</i>      | 17  | 43471275  | 43511787  | protein_coding       | Yes    | Yes (-)             | No    |
| 17 | ENSG00000214425 | <i>LRRC37A4P</i>     | 17  | 43578685  | 43627701  | pseudogene           | No     | Yes (+)             | No    |
| 18 | ENSG00000263503 | <i>RP11-707O23.5</i> | 17  | 43678235  | 43679706  | pseudogene           | No     | Yes (-)             | No    |
| 19 | ENSG00000204650 | <i>CRHRI-IT1</i>     | 17  | 43697694  | 43725582  | pseudogene           | No     | Yes (-)             | No    |
| 20 | ENSG00000185294 | <i>SPPL2C</i>        | 17  | 43922256  | 43924438  | protein_coding       | No     | Yes (-)             | No    |
| 21 | ENSG00000262500 | <i>RP11-259G18.2</i> | 17  | 44320972  | 44322410  | pseudogene           | No     | Yes (-)             | No    |
| 22 | ENSG00000261575 | <i>RP11-259G18.1</i> | 17  | 44344403  | 44346060  | pseudogene           | No     | Yes (-)             | No    |
| 23 | ENSG00000142273 | <i>CBLC</i>          | 19  | 45281126  | 45303891  | protein_coding       | Yes    | No                  | No    |
| 24 | ENSG00000130204 | <i>TOMM40</i>        | 19  | 45393826  | 45406946  | protein_coding       | Yes    | No                  | No    |
| 25 | ENSG00000130203 | <i>APOE</i>          | 19  | 45409011  | 45412650  | protein_coding       | Yes    | No                  | No    |
| 26 | ENSG00000130208 | <i>APOC1</i>         | 19  | 45417504  | 45422606  | protein_coding       | Yes    | No                  | No    |
| 27 | ENSG00000214855 | <i>APOC1P1</i>       | 19  | 45430061  | 45434643  | pseudogene           | Yes    | No                  | Yes   |
| 28 | ENSG00000104859 | <i>CLASRP</i>        | 19  | 45542298  | 45574214  | protein_coding       | No     | No                  | Yes   |

**Supplementary Table 5.** Descriptive statistics of demographic and electronic health record features, by data sources (All of Us vs. UCLA ATLAS, stratified by the genetic inferred group)

| Characteristic             | Hispanic Latino Americans |                   |         | African Americans |                    |         |
|----------------------------|---------------------------|-------------------|---------|-------------------|--------------------|---------|
|                            | All of Us                 | UCLA ATLAS        | p-value | All of Us         | UCLA ATLAS         | p-value |
| N                          | 458                       | 610               | -       | 645               | 440                | -       |
| Age                        | 75.0 (72.4, 79.0)         | 75.8 (72.5, 80.5) | 0.1     | 70 (67, 75)       | 75.8 (72.5, 80.5)  | <0.001* |
| Sex (Female)               | 288 (63%)                 | 372 (61%)         | 0.5     | 437 (68%)         | 264 (60%)          | 0.01*   |
| Span of records (in yrs)   | 6.5 (5.8, 7.8)            | 9.1 (6.8, 10.2)   | <0.001* | 6.5 (5.8, 6.8)    | 9.77 (7.27, 11.02) | <0.001* |
| Encounters per year        | 9 (5, 14)                 | 14 (8, 22)        | <0.001* | 10 (5, 16)        | 13 (8, 22)         | <0.001* |
| Number of encounters       | 59 (31, 105)              | 117 (64, 198)     | <0.001* | 60 (30, 108)      | 129 (71, 209)      | <0.001* |
| Number of unique diagnosis | 46 (28, 68)               | 71 (45, 109)      | <0.001* | 45 (28, 67)       | 71 (45, 103)       | <0.001* |
| Dementia (Yes)             | 68 (15%)                  | 126 (21%)         | 0.02*   | 129 (20%)         | 84 (19%)           | 0.7     |
| <i>APOE-ε4</i> count       |                           |                   | <0.001* |                   |                    | <0.001* |
| 0                          | 425 (93%)                 | 491 (80%)         |         | 517 (80%)         | 284 (65%)          |         |
| 1                          | 32 (7.0%)                 | 117 (19%)         |         | 121 (19%)         | 137 (31%)          |         |
| 2                          | 1 (0.2%)                  | 2 (0.3%)          |         | 7 (1.1%)          | 19 (4.3%)          |         |

**Notes:** Continuous variables were reported as median (IQR), and categorical variables were reported as n (%). P-values were calculated based on Wilcoxon rank sum test or Pearson's Chi-squared test as appropriate. \* Statistical significant at level 0.05.

**Supplementary Table 6.** Descriptive statistics of demographic and electronic health record features by case/control groups, All of Us sample, stratified by genetic ancestry

|                            | Hispanic Latino Americans (N = 458) |                   |         | African Americans (N = 645) |                   |         |
|----------------------------|-------------------------------------|-------------------|---------|-----------------------------|-------------------|---------|
|                            | Cases                               | Controls          | P value | Cases                       | Controls          | P value |
| N                          | 68                                  | 390               | -       | 129                         | 516               | -       |
| Age                        | 76.1 (70.1, 80.6)                   | 74.9 (72.8, 78.9) | 0.5     | 70.6 (65.8, 77.1)           | 70.0 (67.7, 74.8) | 0.5     |
| Sex (Female)               | 42 (62%)                            | 246 (63%)         | 0.8     | 81 (63%)                    | 356 (69%)         | 0.20    |
| Span of records (in yrs)   | 4.5 (2.8, 6.3)                      | 6.6 (6.0, 8.1)    | <0.001* | 4.0 (2.1, 6.1)              | 6.6 (6.2, 7.2)    | <0.001* |
| Encounters per year        | 10 (4, 19)                          | 8 (5, 14)         | 0.2     | 15 (7, 23)                  | 9 (5, 15)         | <0.001* |
| Number of encounters       | 36 (15, 78)                         | 63 (34, 108)      | <0.001* | 49 (20, 89)                 | 65 (34, 110)      | <0.001* |
| Number of unique diagnosis | 52 (27, 69)                         | 46 (28, 68)       | 0.9     | 53 (32, 74)                 | 43 (27, 65)       | 0.01*   |

**Notes:** Continuous variables were reported as median (IQR), and categorical variables were reported as n (%). P-values were calculated based on Wilcoxon rank sum test or Pearson's Chi-squared test as appropriate. \* Statistical significant at level 0.05.

**Supplementary Table 7.** Pearson's correlation of polygenic risk scores that built with genome-wide-significant or gene-annotated SNPs, UCLA ATLAS sample, stratified by genetic inferred

| <b>Polygenic risk score GWAS</b>        | <b>Pearson's Correlation</b>    |                         |
|-----------------------------------------|---------------------------------|-------------------------|
|                                         | <b>Hispanic Latino American</b> | <b>African American</b> |
| Alzheimer's Disease (European ancestry) | 0.885                           | 0.837                   |
| Alzheimer's Disease (African ancestry)  | 0.953                           | 0.963                   |
| Alzheimer's Disease (multi-ancestry)    | 0.953                           | 0.919                   |
| Lewy Body Dementia                      | 0.714                           | 0.698                   |
| Parkinson's Disease                     | 0.561                           | 0.29                    |
| Progressive Supranuclear Palsy          | 0.813                           | 0.657                   |
| Stroke                                  | 0.737                           | 0.669                   |

*Abbreviations: GWAS, genome-wide association study, SNP, Single-Nucleotide Polymorphism.*

**Supplementary Table 8.** GWAS information and summary results of FUMA by phenotype

| GWAS information               |                      |                              |                | # SNPs (overlapped with UCLA and AOU data <sup>b</sup> ) |                           |                            |
|--------------------------------|----------------------|------------------------------|----------------|----------------------------------------------------------|---------------------------|----------------------------|
| Phenotype                      | Summary statistics   | 1000G reference <sup>a</sup> | N case/control | Candidate                                                | Independent P-significant | Independent gene-annotated |
| Alzheimer's Disease            | Kunkle et al. (2019) | EUR                          | 21,982/41,944  | 1744                                                     | 76                        | 75                         |
|                                | Kunkle et al. (2021) | AFR                          | 2,784/5,222    | 80                                                       | 11                        | 11                         |
|                                | Jun et al. (2017)    | ALL                          | 15,579/17,690  | 760                                                      | 54                        | 54                         |
| Parkinson's Disease            | Nalls et al. (2019)  | EUR                          | Meta-analysis  | 2640                                                     | 27                        | 27                         |
| Progressive Supranuclear Palsy | Chen et al. (2018)   | EUR                          | 1,646/10,662   | 732                                                      | 21                        | 21                         |
| Lewy Body Dementia             | Chia et al. (2021)   | EUR                          | 2,981/4,391    | 356                                                      | 9                         | 9                          |
| Stroke                         | Malik et al. (2018)  | ALL                          | 67,162/454,450 | 903                                                      | 21                        | 20                         |

Abbreviations: AFR, African American; EUR, European; GWAS, genome-wide association study; SNP, Single-Nucleotide Polymorphism.

Notes: [a] Reference panel population used for regional linkage disequilibrium patterns in identifying independent SNPs and lead P-significant SNPs. [b] Numbers of features used in PRSs building, feature selection for modeling, and phenotype prediction in the following steps.

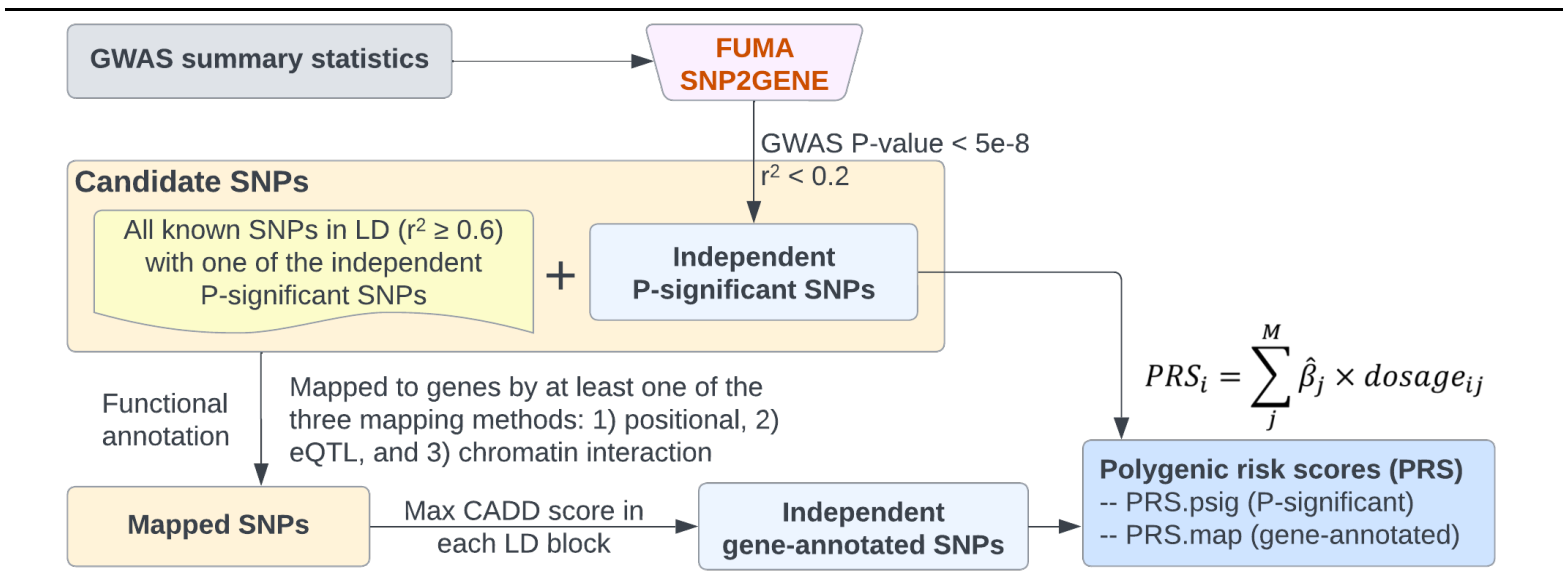

**Supplementary Figure 2. Workflow of candidate SNP selection.** Functional annotation and prioritization of SNPs using FUMA. Two distinct sets of SNPs (independent genome-wide-significant SNPs and independent gene-annotated SNPs) were identified by FUMA and subsequently used in our polygenic risk scores building and modeling steps. *Abbreviations: CADD, Combined Annotation Dependent Depletion; GWAS, genome-wide association study; LD, linkage disequilibrium; PRS, polygenic risk score; SNP, Single-Nucleotide Polymorphism.*

**Supplementary Table 9.** ICD-10 codes used for dementia phenotype definition

| <b>ICD-10 code</b> | <b>Description</b>                                                                                     |
|--------------------|--------------------------------------------------------------------------------------------------------|
| <b>F01</b>         | <b>Vascular dementia</b>                                                                               |
| F01.5              | Multi-infarct dementia                                                                                 |
| F01.50             | Multi-infarct dementia, unspecified                                                                    |
| F01.51             | Multi-infarct dementia with delirium                                                                   |
| F01.511            | Multi-infarct dementia with delirium in Alzheimer's disease                                            |
| F01.518            | Multi-infarct dementia with delirium, not elsewhere classified                                         |
| <b>F02.8*</b>      | <b>Dementia in other diseases classified elsewhere</b>                                                 |
| F02.80             | Dementia in other diseases classified elsewhere, without behavioral disturbance                        |
| F02.81             | Dementia in other diseases classified elsewhere, with behavioral disturbance                           |
| F02.811            | Dementia in other diseases classified elsewhere, with behavioral disturbance in Alzheimer's disease    |
| F02.818            | Dementia in other diseases classified elsewhere, with behavioral disturbance, not elsewhere classified |
| <b>F03</b>         | <b>Unspecified dementia</b>                                                                            |
| F03.9              | Unspecified dementia without behavioral disturbance                                                    |
| F03.90             | Unspecified dementia with delirium                                                                     |
| F03.91             | Unspecified dementia with delirium in Alzheimer's disease                                              |
| F03.911            | Unspecified dementia with delirium in Alzheimer's disease, with behavioral disturbance                 |
| F03.918            | Unspecified dementia with delirium in Alzheimer's disease, not elsewhere classified                    |
| <b>G30</b>         | <b>Alzheimer's disease</b>                                                                             |
| G30.0              | Alzheimer's disease with early onset                                                                   |
| G30.1              | Alzheimer's disease with late onset                                                                    |
| G30.8              | Other Alzheimer's disease                                                                              |
| G30.9              | Alzheimer's disease, unspecified                                                                       |
| <b>G31</b>         | <b>Other degenerative diseases of nervous system, not elsewhere classified</b>                         |
| G31.0              | Pick's disease                                                                                         |
| G31.01             | Pick's disease with early onset                                                                        |
| G31.09             | Pick's disease with late onset                                                                         |
| G31.1              | Frontotemporal dementia                                                                                |
| G31.83             | Dementia with Lewy bodies                                                                              |
| G31.85             | Corticobasal degeneration                                                                              |
| G23.1              | Parkinson's disease with dementia                                                                      |

---

|       |                                                                      |
|-------|----------------------------------------------------------------------|
| AA    | African American                                                     |
| AD    | Alzheimer's disease                                                  |
| APOE  | Apolipoprotein E                                                     |
| AUPRC | Area Under the Precision-Recall Curve                                |
| AUROC | area under the receiver operating characteristic                     |
| CADD  | Combined Annotation-Dependent Depletion                              |
| CI    | confidence intervals                                                 |
| EA    | European American                                                    |
| EAA   | East Asian American                                                  |
| EHR   | Electronic Health Records                                            |
| FTD   | Frontotemporal dementia                                              |
| FUMA  | Functional Mapping and Annotation of Genome-Wide Association Studies |
| GIA   | Genetic Inferred Ancestry                                            |
| GO    | Gene Ontology                                                        |
| GWAS  | Genome-Wide Association Studies                                      |
| HLA   | Hispanic Latino American                                             |
| LBD   | Lewy body dementia                                                   |
| LD    | Linkage disequilibrium                                               |
| MCC   | Matthews Correlation Coefficient                                     |
| PC    | principal components                                                 |
| PDD   | Parkinson's disease dementia                                         |
| PRS   | Polygenic risk scores                                                |
| SAA   | South Asian American                                                 |
| SNP   | Single-Nucleotide Polymorphisms                                      |

---
